# Supplementary material for: Highly Sensitive RNA-Based Electrochemical Aptasensor for the Determination of C-Reactive Protein Using Carbon Nanofiber-Chitosan Modified Screen-Printed Electrode
Source: MDPI journal article supplement (doi:10.3390/nano12030415), 2022-01-27
Supplement: s1 [file s1]

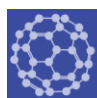

## Supplementary Materials

# Highly Sensitive RNA-Based Electrochemical Aptasensor for the Determination of C-Reactive Protein Using Carbon Nanofiber-Chitosan Modified Screen-Printed Electrode

Mahmoud Amouzadeh Tabrizi \* and Pablo Acedo \*

Electronic Technology Department, Universidad Carlos III de Madrid, 28911 Leganés, Spain

\* Correspondence: mamouzad@ing.uc3m (mahmoud.tabrizi@gmail.com (M.A.T.); pag@ing.uc3m.es (P.A.))

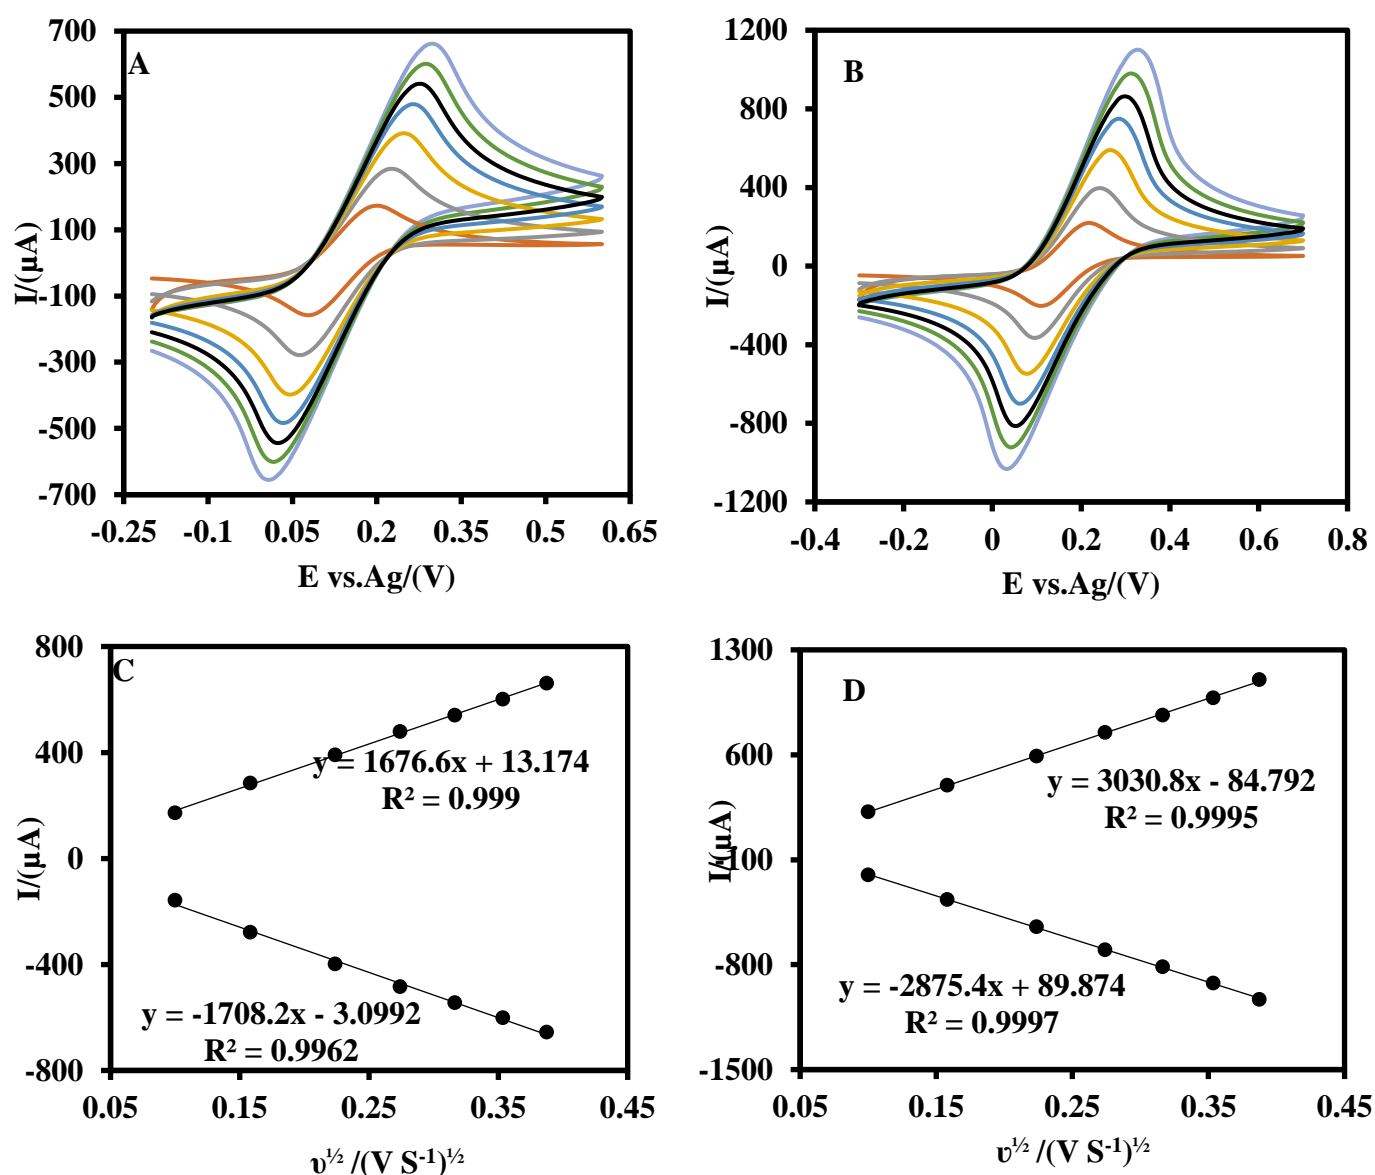

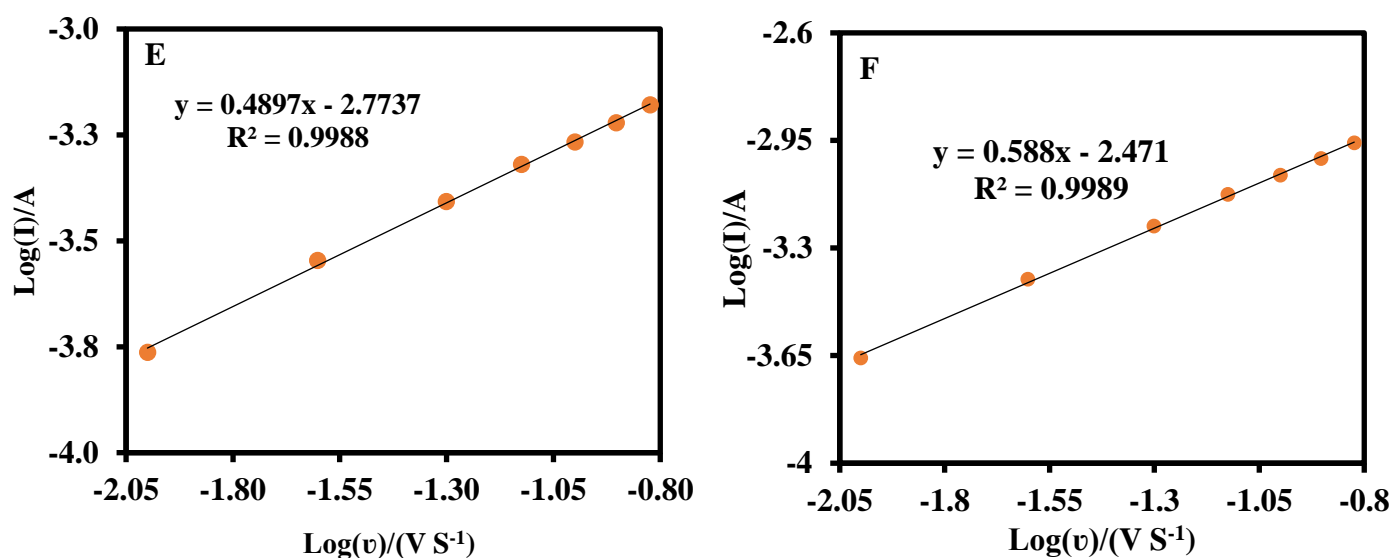

**Figure S1.** CVs of the CSPE (A) and CSPE/CNF-CHIT (B) in 16.0 mM  $\text{Fe}(\text{CN})_6^{3-/4-}$  solution (0.1M PBS, pH 7.4) at various scan rates (0.01, 0.025, 0.05, 0.075, 0.1, 0.125, and 0.15 from inner to outer). The plot of the anodic peak current ( $I_{pa}$ ) and cathodic peak current ( $I_{pc}$ ) versus square root of scan rate ( $v$ ) for CSPE (C) and CSPE/CNF-CHIT (D). The plot of the logarithm of the anodic peak current ( $I_{pa}$ ) versus the logarithm of scan rate ( $v$ ) for CSPE (E) and CSPE/CNF-CHIT (F).

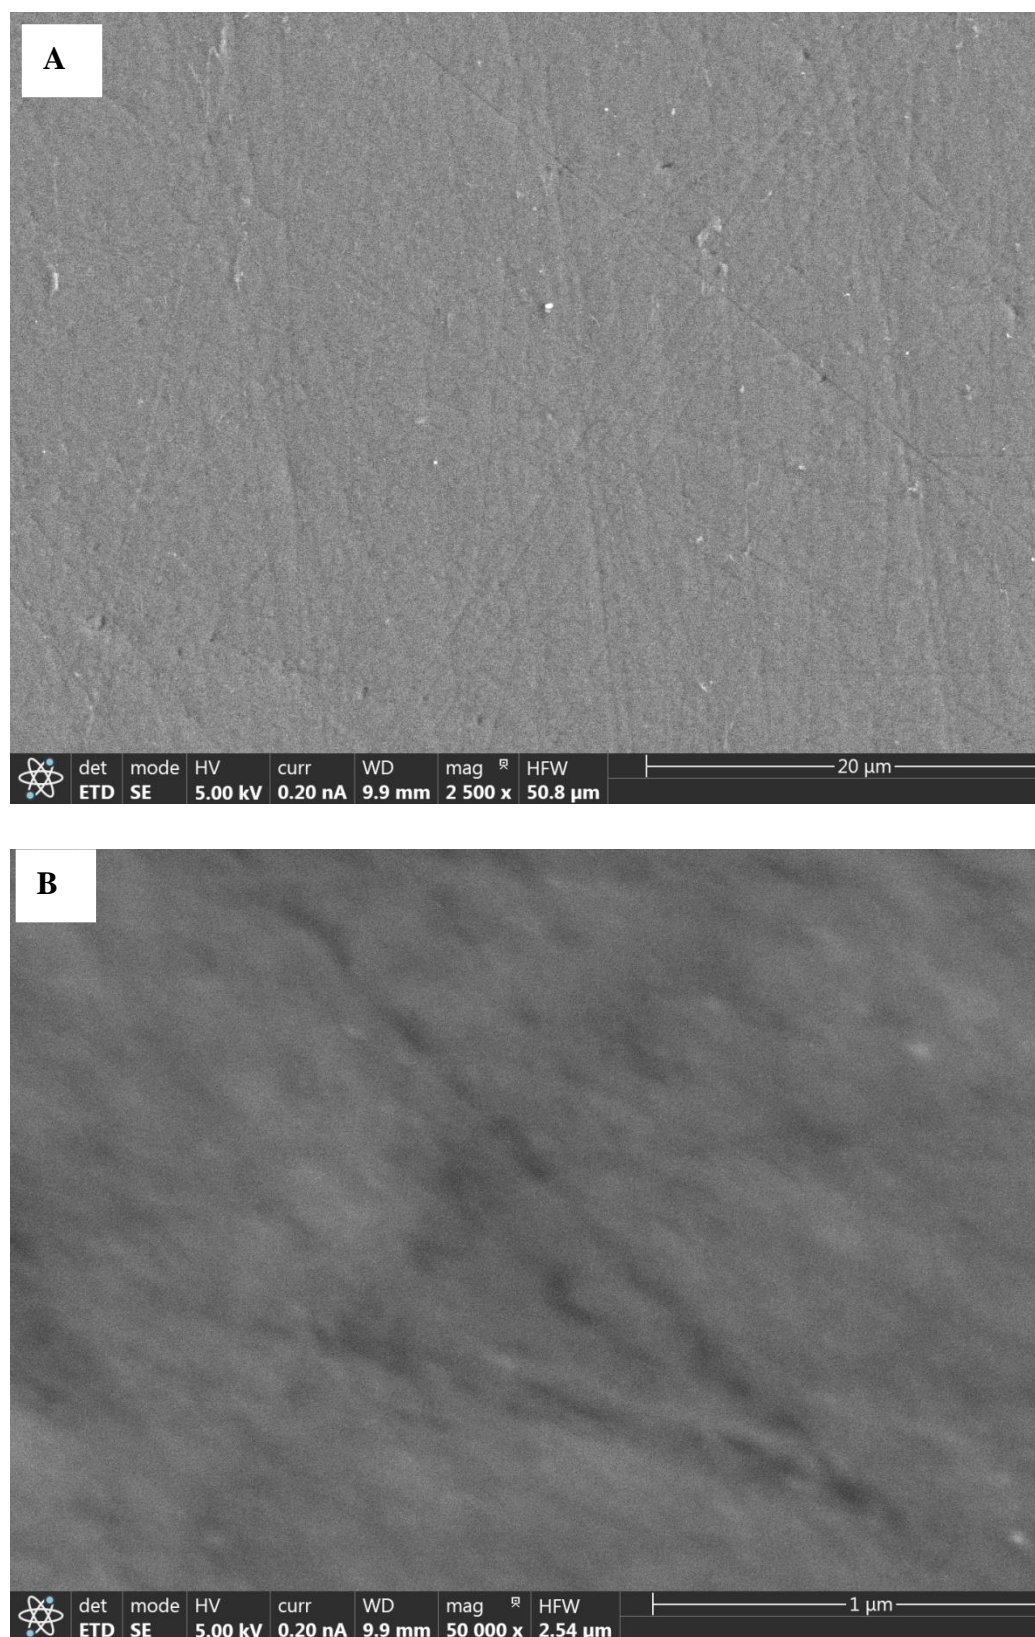

**Figure S2.** SEM images (A, B) of a glassy carbon electrode.

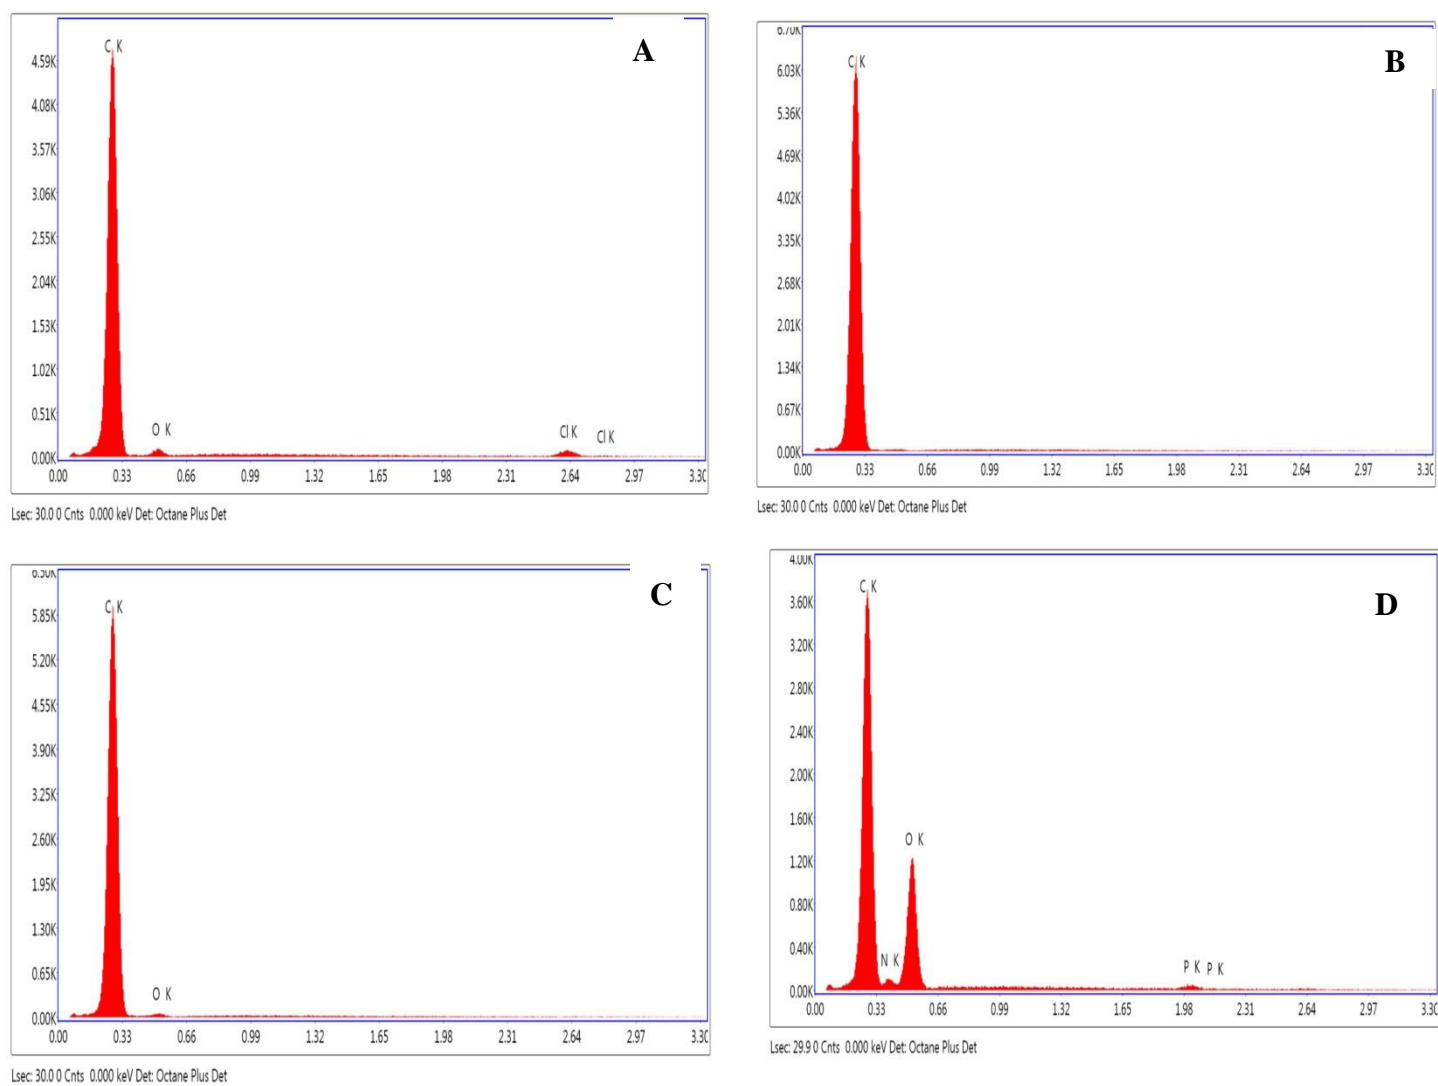

**Figure S3.** EDS of CSPE (A), CSPE/CNFs (B), CSPE/CNFs-CHIT (C), CSPE/CNFs-CHIT-GLU-RNA aptamer (D).

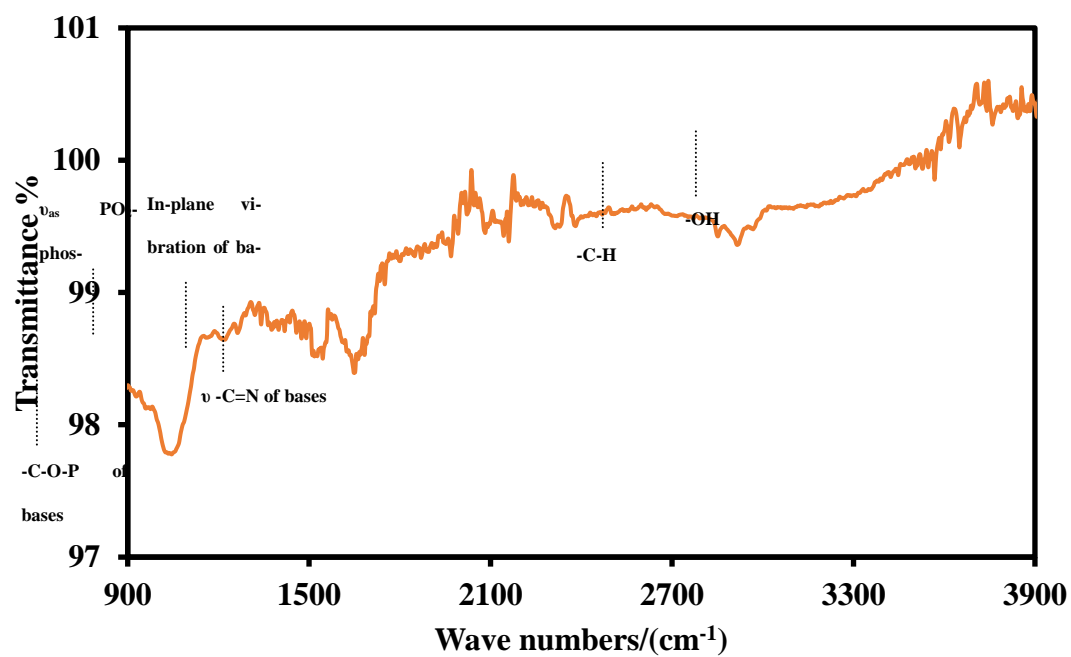

Figure S4. ATR spectrum of the CSPE/CNFs-CHIT-GLU-RNA aptamer.

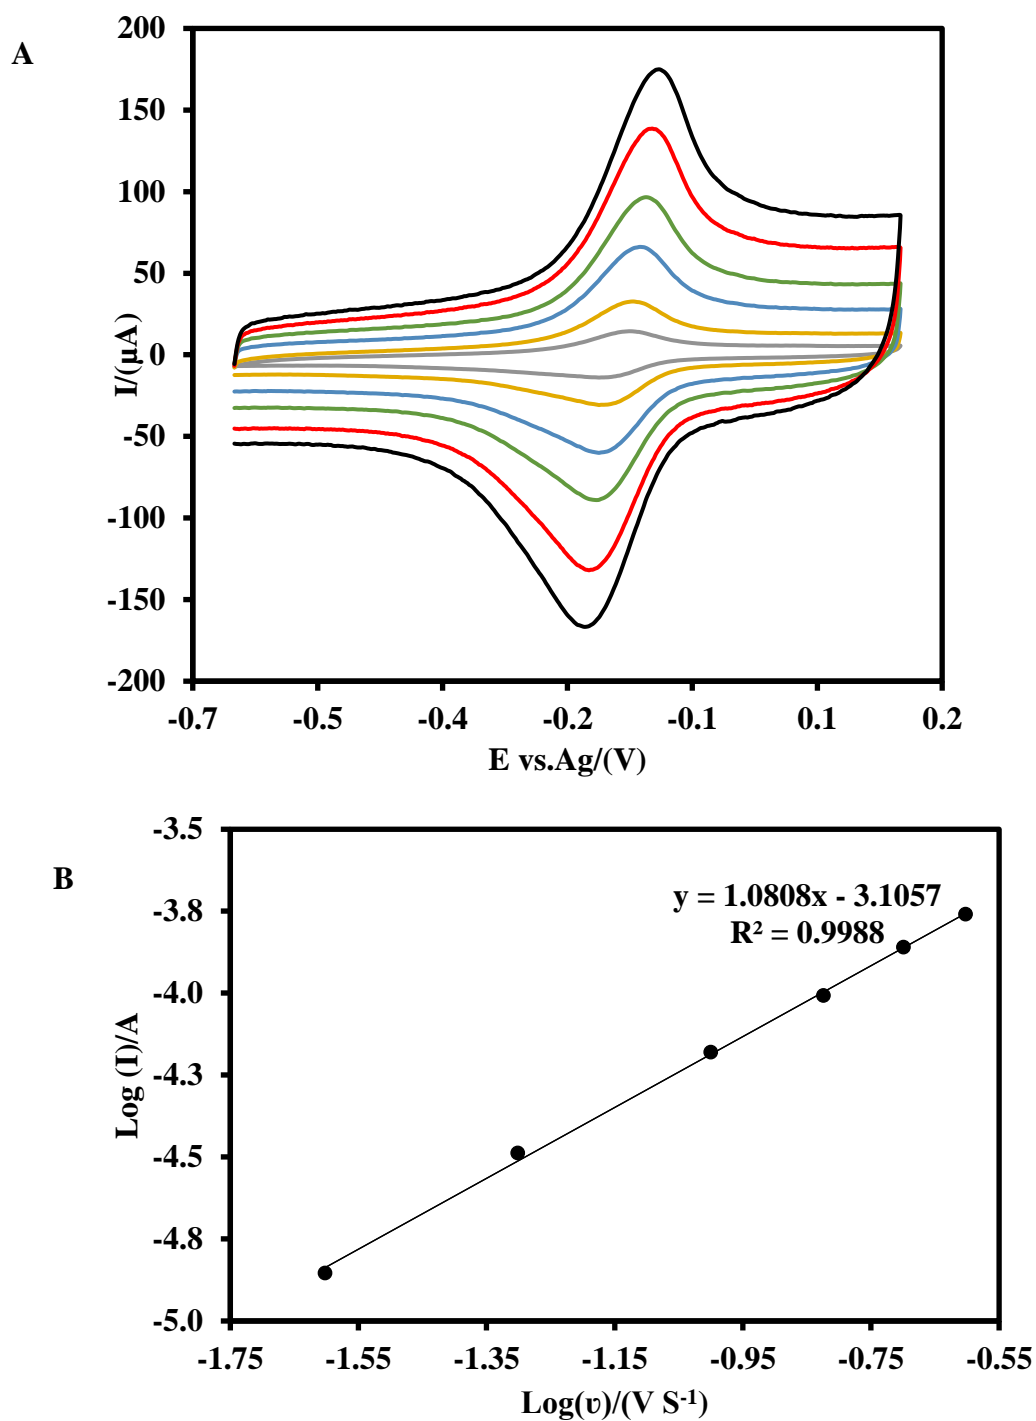

**Figure S5.** CVs of the CSPE/CNFs-CHIT-GLU-RNA aptamer-MB (A) in a PBS at various scan rates (0.01, 0.025, 0.05, 0.075, 0.1, 0.125, 0.15, 0.175, 0.2, 0.225, and 0.25  $\text{Vs}^{-1}$  from inner to outer). The plot of the logarithm of the anodic peak current ( $I_{pa}$ ) versus the logarithm of scan rate ( $\nu$ ) for CSPE/CNF-CHIT-GLU-RNA aptamer-MB (B).

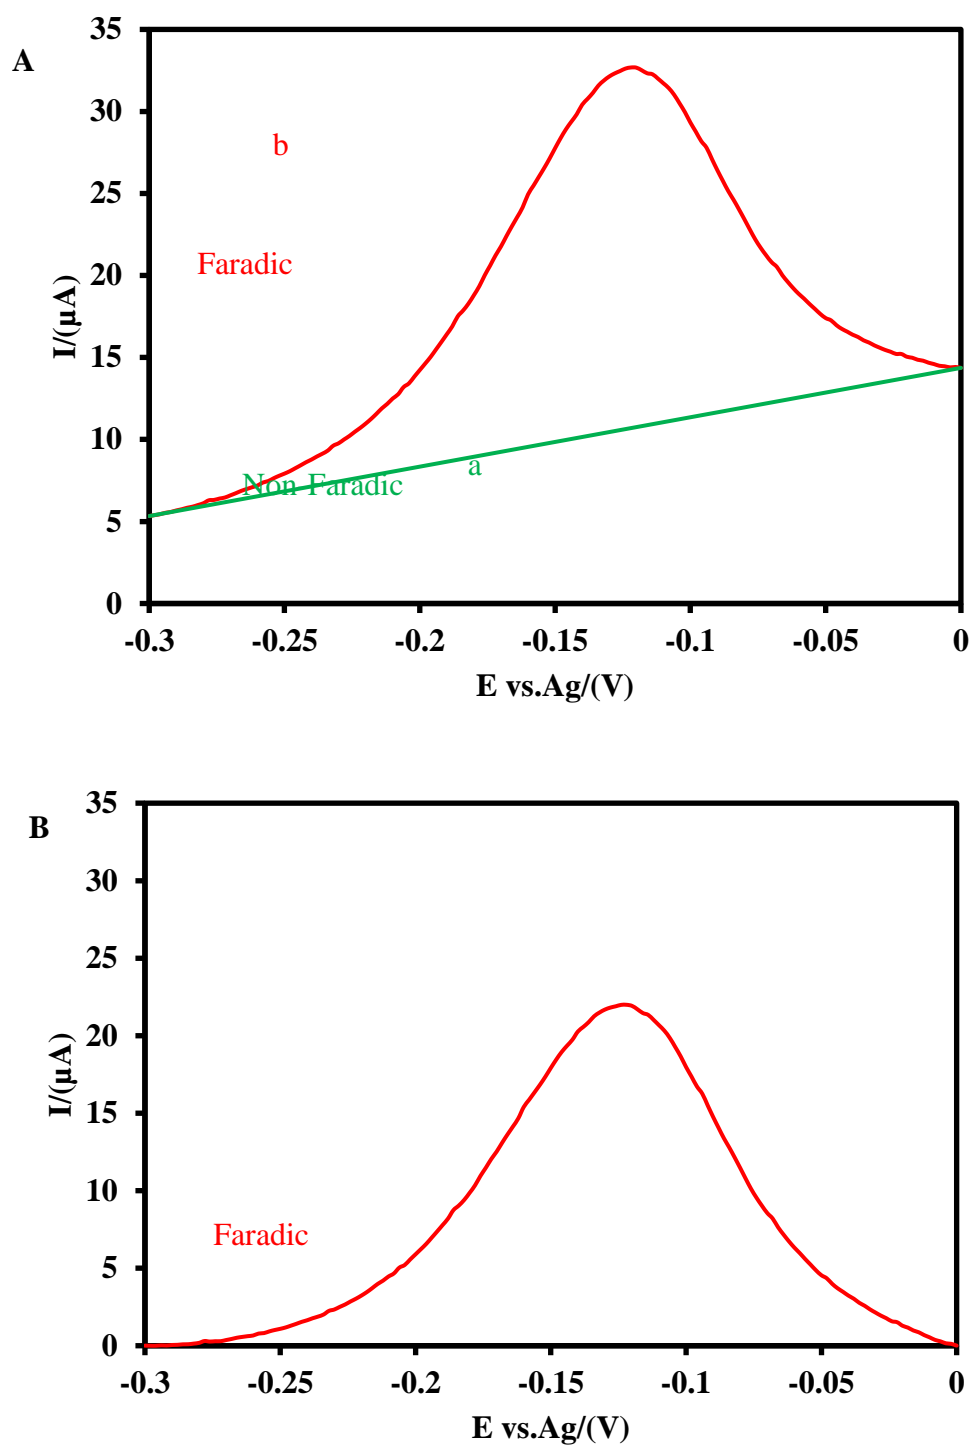

**Figure S6.** The anodic peak current obtained from CV of the CSPE/CNFs-CHIT-GLU-RNA aptamer-MB includes non-Faradic current (a area) and Faradic current (b area) (A) at a scan rate of  $0.05 \text{ Vs}^{-1}$ . The anodic peak current (Faradic current) was obtained from the CV of the CSPE/CNF-CHIT-GLU-RNA aptamer-MB after the subtraction of non-Faradic current from the total current (B).

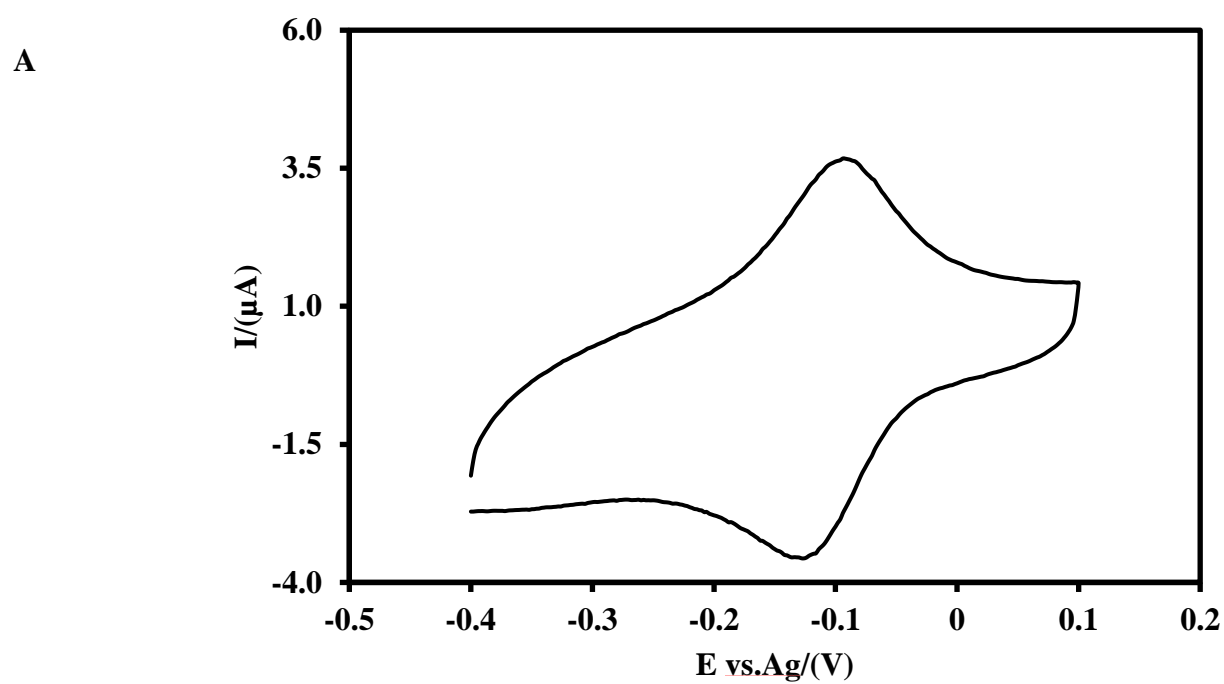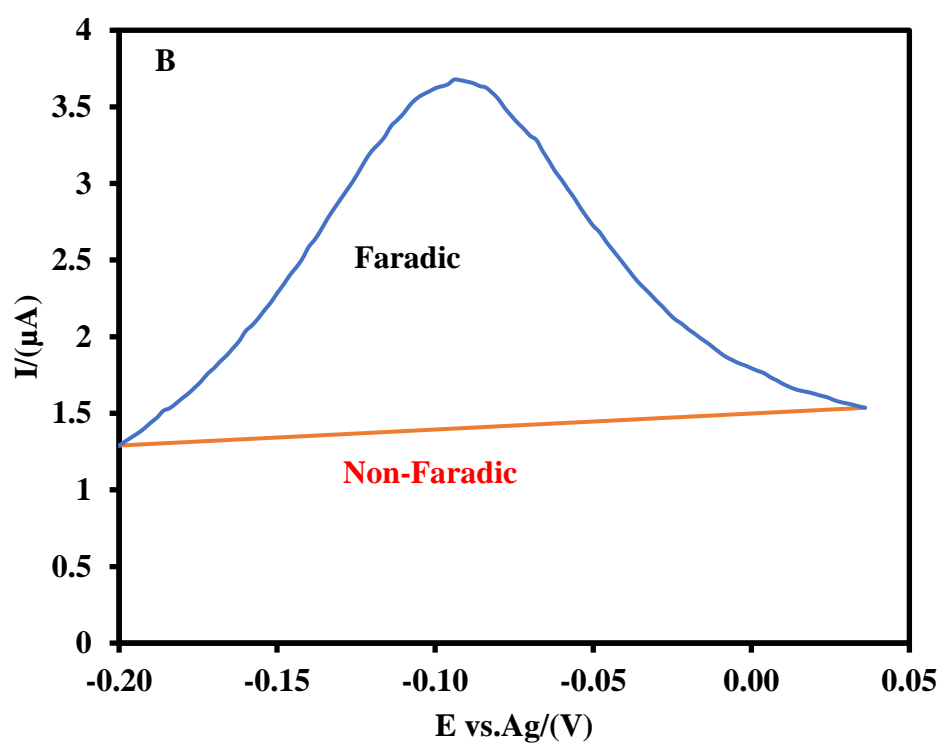



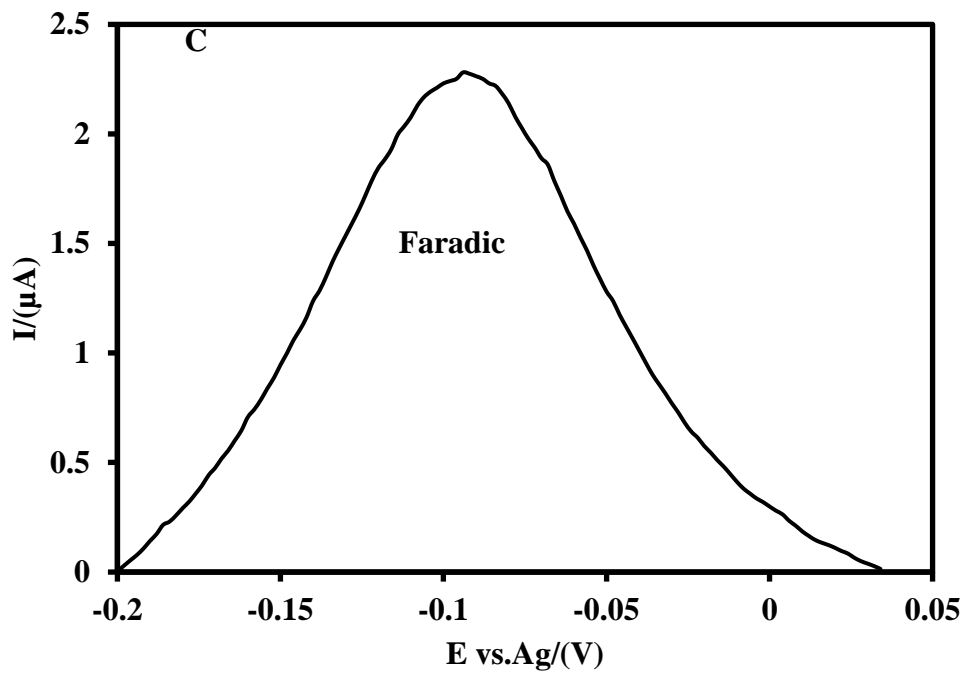

**Figure S7.** CV of the CSPE/CHIT-GLU-RNA aptamer-MB (A) in a PBS at a scan rate of  $0.05 \text{ V.s}^{-1}$ . The anodic peak current obtained from CV of CSPE/CNFs-CHIT-GLU-RNA aptamer-MB includes non-Faradic current and Faradic current (B). The anodic peak current (faradic current) obtained from CV of the CSPE/CNFs-CHIT-GLU-RNA aptamer-MB after the subtraction of non-Faradic current from the total current (C).

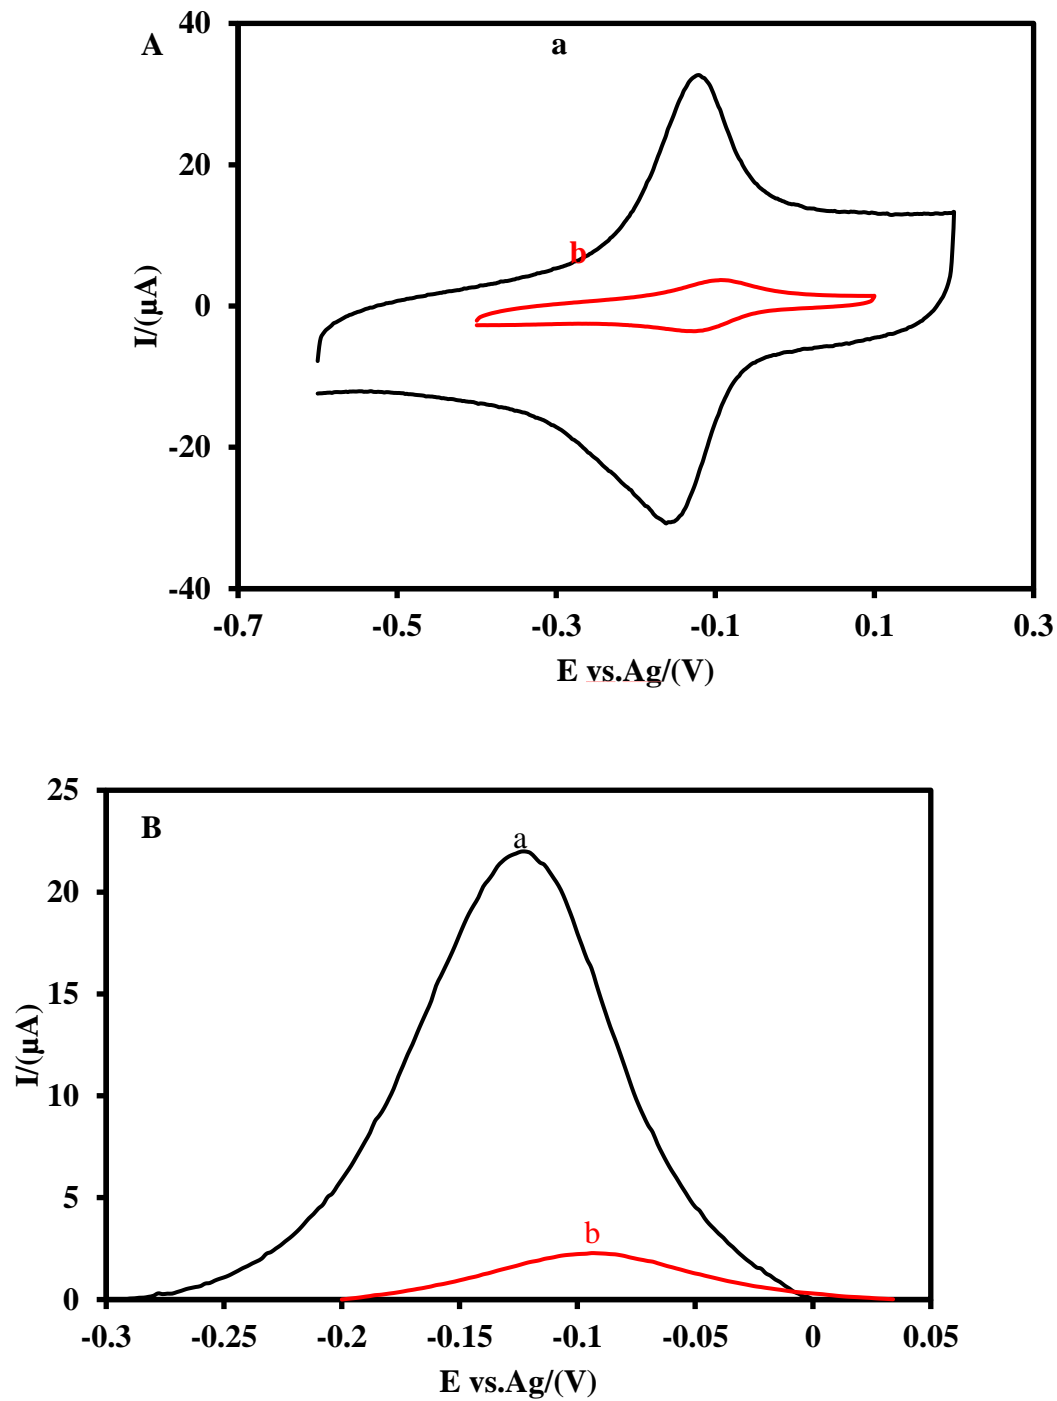

**Figure S8.** CVs (A) and Faradic anodic current (B) of the CSPE/CNFs-CHIT-GLU-RNA aptamer-MB (a) and the CSPE/CHIT-GLU-RNA aptamer-MB (b) in a PBS at a scan rate of  $0.05 \text{ Vs}^{-1}$ .

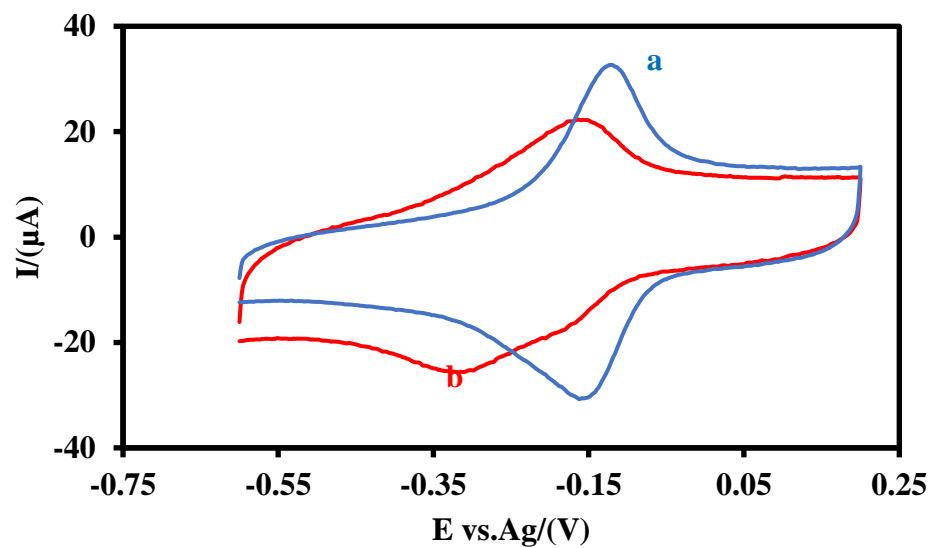

**Figure S9.** CVs of the CSPE/CNFs-CHIT-GLU-RNA aptamer-MB in a PBS in the absence (a) and presence of 50 pM CRP (b) at a scan rate of 0.05 Vs<sup>-1</sup>.

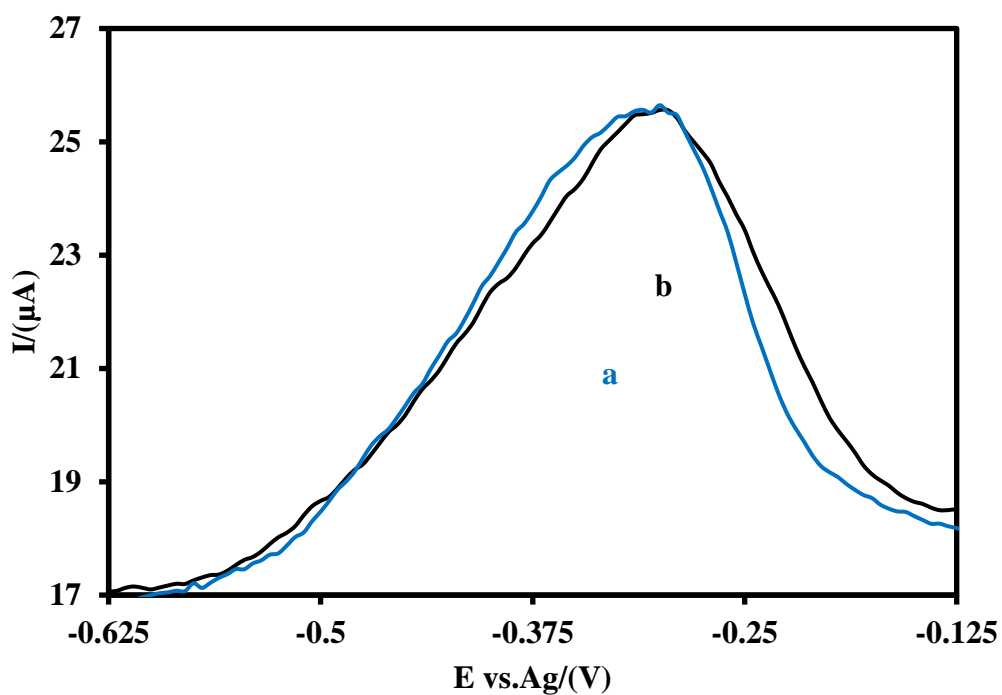

**Figure S10.** SWVs of the CSPE/CNFs-CHIT-GLU-RNA aptamer-MB to 10 pM CRP in a PBS (0.1 M, pH 7.4) in the absence (a) and presence of 100 pM HSA and 100 pM HlgG (b).

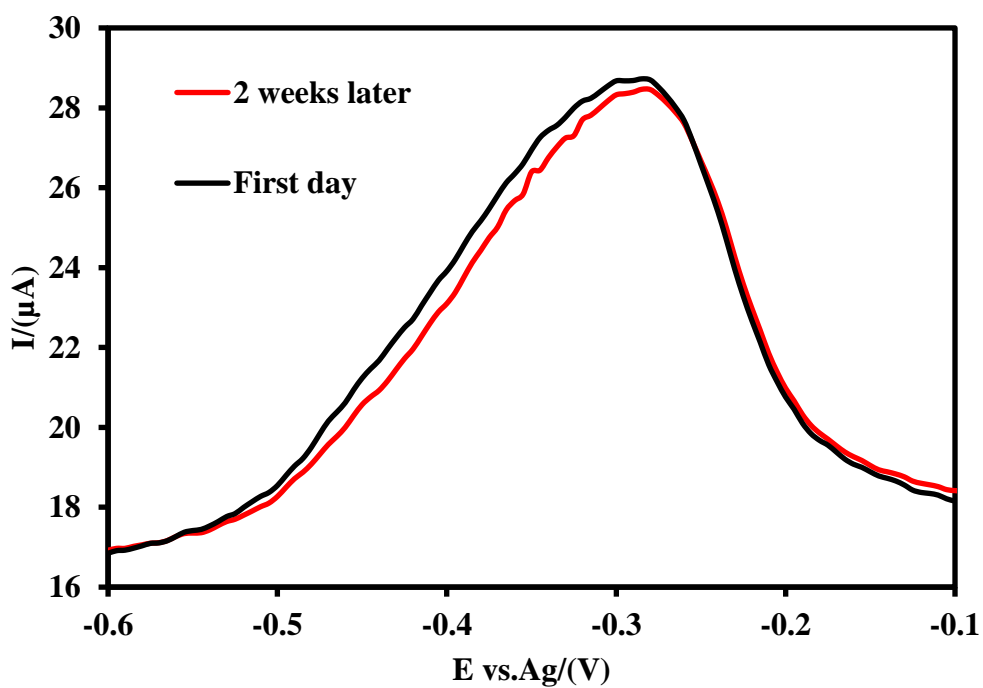

**Figure S11.** SWVs of the CSPE/CNFs-CHIT-GLU-RNA aptamer-MB in a PBS (0.1 M, pH 7.4) in the first day (a) and 2 weeks after its fabrication (b).

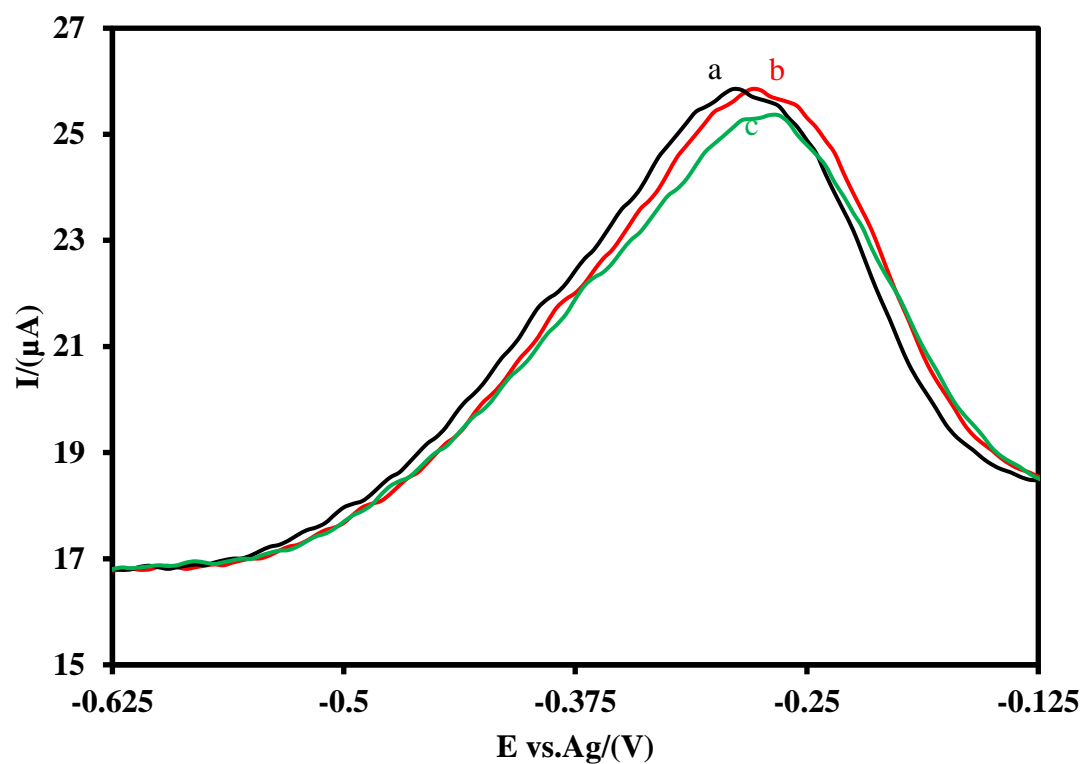

**Figure S12.** SWVs of the three different aptasensors (a-c) to 10 pM CRP in a PBS related to the reproducibility of the aptasensor.

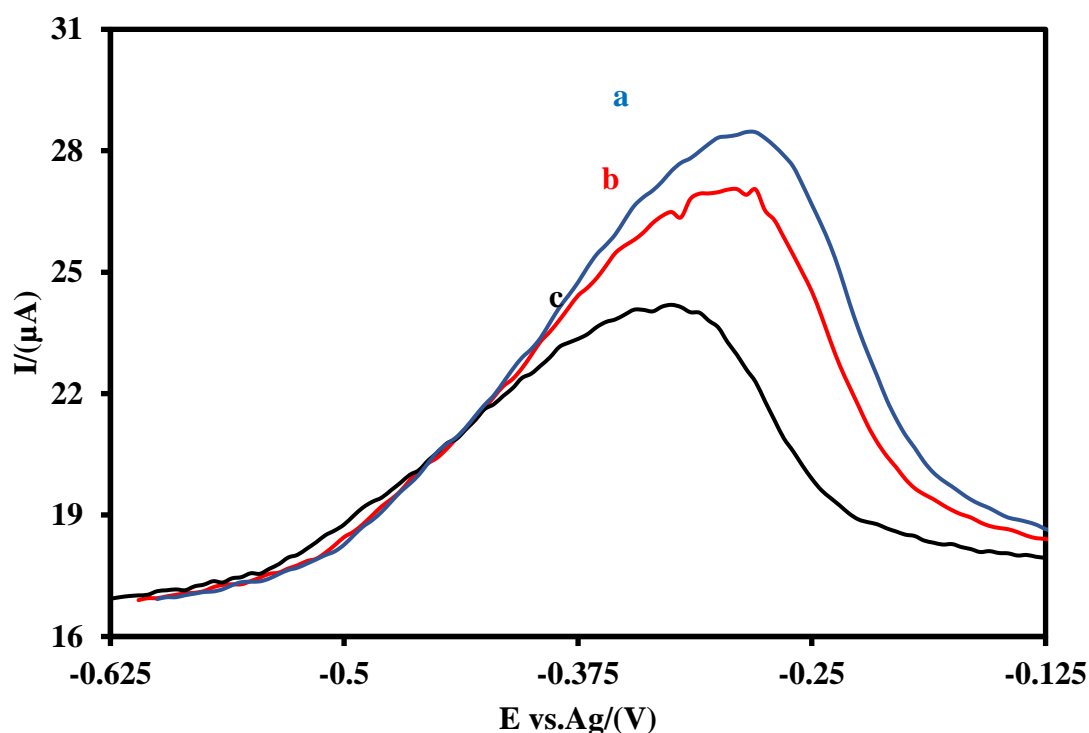

**Figure S13.** SWVs of the CSPE/CNFs-CHIT-GLU-RNA aptamer-MB in the 5-fold diluted plasma serum sample with PBS in the absence (a) and presence of 2 pM (b) and 10 pM CRP (c).

### Preparation of human serum sample

5 mL of fresh human blood was transferred into a tube and kept at room temperature for 20 min. Then, the human blood was centrifuged for 10 min at 3000 rpm. Finally, a part of the above solution was separated and divided into small tubes. The prepared human serum samples were then stored at  $-80^{\circ}\text{C}$  until use.

**Table S1.** Comparison of the obtained results between the proposed RNA aptasensor and an ELISA kit.

| Sample | Obtained concentration by MIP sensor/(pM) | Mean/(pM) | Standard deviation | Count | Standard error of mean | Degree of freedom | Hypothesized mean/(pM) | T-value | P-value | Obtained concentration by ELISA kit/(pM) |
|--------|-------------------------------------------|-----------|--------------------|-------|------------------------|-------------------|------------------------|---------|---------|------------------------------------------|
| 1      | 2.0; 1.9, 2.1; 2.2                        | 2.05      | 0.13               | 4.0   | 0.064                  | 3.0               | 2.0                    | 0.77    | 0.49    | 2.0                                      |
| 2      | 10.3; 10.1; 9.75; 10.0                    | 10.03     | 0.22               | 4.0   | 0.11                   | 3.0               | 10.0                   | 0.32    | 0.74    | 10.0                                     |

**Table S2.** Comparison of the analytical performance of the CSPE/CNF-CHIT-GLU-RNA Aptamer-MB with the other immunosensors for CRP.

| Biosensor                                                                                               | Detection technique | Linear range                   | LOD                       | Ref      |
|---------------------------------------------------------------------------------------------------------|---------------------|--------------------------------|---------------------------|----------|
| Gold/ZnO/succinimidyl propionate/Anti-CRP                                                               | EIS                 | 0.01–20 $\mu\text{g mL}^{-1}$  | 0.1 $\mu\text{g mL}^{-1}$ | [1]      |
| C-SPE/Au <sub>nano</sub> /Cysteine Anti-CRP                                                             | CAM                 | 0.047–23.6 $\mu\text{g/mL}$    | 0.15 nM                   | [2]      |
| Au nanowire/ 3-mercaptopropionic acid/Anti-CRP                                                          | SWV                 | 5–220 $\text{fg mL}^{-1}$      | 2.25 $\text{fg mL}^{-1}$  | [3]      |
| Gold/11-mercaptopundecanoic acid and 3,3-dithiodipropionic acid/ Anti-CRP                               | CAM                 | 2.2 to 100 $\text{ng mL}^{-1}$ | 2.2 $\text{ng mL}^{-1}$   | [4]      |
| SPE/Aunano/Thiol-terminated poly(2-methacryloyloxyethyl phosphorylcholine)/Ca <sup>2+</sup>             | DPV                 | 5–5000 $\text{ng mL}^{-1}$     | 1.6 $\text{ng/mL}^{-1}$   | [5]      |
| Giant magnetoimpedance/ Anti-CRP and functionalized magnetic bead with anti-CRP as a secondary antibody | EIS                 | 1–10 $\text{ng mL}^{-1}$       | 1 $\text{ng mL}^{-1}$     | [6]      |
| Gold/11-mercaptopundecanoic acid/ Anti-CRP                                                              | EGOTFT              | 210–6 $\times 10^{14}$ zM      | 210 zM                    | [7]      |
| ZnO/Polyethylene terephthalate/ Anti-CRP                                                                | EIS                 | 1–15 $\text{ng mL}^{-1}$       | 1 $\text{ng mL}^{-1}$     | [8]      |
| ITO/Titania nanotubes/ Platinum nanowire/Anti-CRP                                                       | ECL                 | 0.05–6.25 ng                   | 0.011 ng                  | [9]      |
| GCE/ graphene quantum dots/ PEG-thiol/Anti-CRP                                                          | EIS                 | 0.5–70 nM                      | 176 pM                    | [10]     |
| ITO/3-cyanopropyltrimethoxysilane/ Anti-CRP                                                             | EIS                 | 3.25–208 $\text{fg mL}^{-1}$   | 0.455 $\text{fg mL}^{-1}$ | [11]     |
| CSPE/CNF-CHIT-RNA aptamer-MB                                                                            | SWV                 | 1–150 pM                       | 0.37 pM                   | The work |

CAM: Chronoamperometry; DPV: Differential pulse voltammetry; EGOTFT: Electrolyte-gated organic thin-film transistor

## References

1. Tanak, A.S.; Jagannath, B.; Tamrakar, Y.; Muthukumar, S.; Prasad, S. Non-faradaic electrochemical impedimetric profiling of procalcitonin and c-reactive protein as a dual marker biosensor for early sepsis detection. *Anal. Chim. Acta X* **2019**, *3*, 100029.
2. Thangamuthu, M.; Santschi, C.; O, J.F.M. Label-free electrochemical immunoassay for c-reactive protein. *Biosensors* **2018**, *8*.
3. Vilian, A.T.E.; Kim, W.; Park, B.; Oh, S.Y.; Kim, T.; Huh, Y.S.; Hwangbo, C.K.; Han, Y.-K. Efficient electron-mediated electrochemical biosensor of gold wire for the rapid detection of c-reactive protein: A predictive strategy for heart failure. *Biosens. Bioelectron.* **2019**, *142*, 111549.
4. Fakanya, W.M.; Tothill, I.E. Detection of the inflammation biomarker c-reactive protein in serum samples: Towards an optimal biosensor formula. *Biosensors* **2014**, *4*, 340–357.

5. Pinyorospatum, C.; Chaiyo, S.; Sae-ung, P.; Hoven, V.P.; Damsongsang, P.; Siangproh, W.; Chailapakul, O. Disposable paper-based electrochemical sensor using thiol-terminated poly(2-methacryloyloxyethyl phosphorylcholine) for the label-free detection of c-reactive protein. *Mikrochim Acta* **2019**, *186*, 472.
6. Yang, Z.; Liu, Y.; Lei, C.; Sun, X.-c.; Zhou, Y. A flexible giant magnetoimpedance-based biosensor for the determination of the biomarker c-reactive protein. *Mikrochim Acta* **2015**, *182*, 2411–2417.
7. Macchia, E.; Manoli, K.; Holzer, B.; Di Franco, C.; Picca, R.A.; Cioffi, N.; Scamarcio, G.; Palazzo, G.; Torsi, L. Selective single-molecule analytical detection of c-reactive protein in saliva with an organic transistor. *Anal. Bioanal. Chem.* **2019**, *411*, 4899–4908.
8. Cao, L.; Kiely, J.; Piano, M.; Luxton, R. Facile and inexpensive fabrication of zinc oxide based bio-surfaces for c-reactive protein detection. *Sci. Rep.* **2018**, *8*, 12687.
9. Rong, Z.; Chen, F.; Jilin, Y.; Yifeng, T. A c-reactive protein immunosensor based on platinum nanowire / titania nanotube composite sensitized electrochemiluminescence. *Talanta* **2019**, *205*, 120135.
10. Bing, X.; Wang, G. Label free c-reactive protein detection based on an electrochemical sensor for clinical application. *Int. J. Electrochem. Sci.* **2017**, *12*, 6304 – 6314.
11. Sonuç Karaboğa, M.N.; Sezgintürk, M.K. A novel silanization agent based single used biosensing system: Detection of c-reactive protein as a potential alzheimer's disease blood biomarker. *J. Pharm. Biomed. Anal.* **2018**, *154*, 227–235.
